# Supplementary material
Source: HighWire-hosted journal article supplement (https://jnm.snmjournals.org/highwire/filestream/94454/field_highwire_adjunct_files/0/117028_Supplemental_Data.pdf)
Supplement: 117028_Supplemental_Data.pdf [file 117028_Supplemental_Data.pdf]

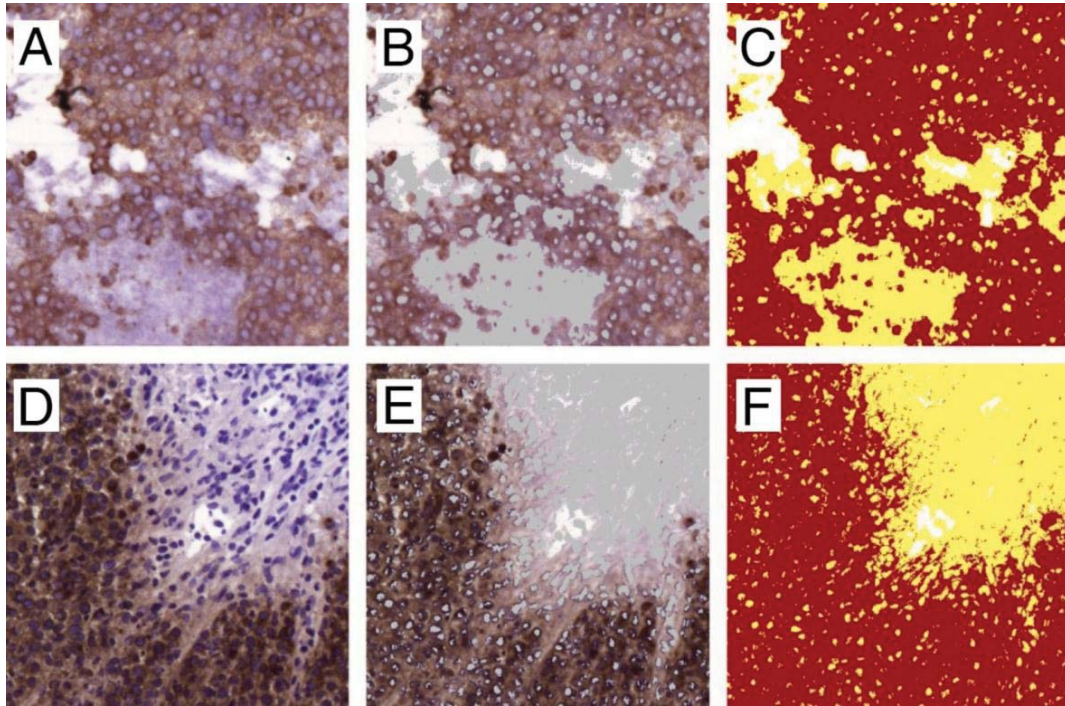

**SUPPLEMENTAL FIGURE 1.** Quantification of the section area stained for antigen detection in animal Group 1 (top) and Group 2 (bottom). The images show sections stained with BR96 antibody (A and D), the same images after processing to suppress hematoxylin staining (B and E), and final classification of the stained area in red and non-stained section area in yellow (C and F). Processing is performed by pixels (in red-green-blue digital images) with a higher intensity in the blue channel than in the red channel being set to a gray color using IDL to avoid cell nuclei staining being recorded as positive for the antigen.
